# Supplementary material for: Suppression of Jahn–Teller distortion in a layered Mn-based oxide cathode with Li substitution toward achieving stable K-storage
Source: Royal Society of Chemistry journal article supplement (doi:10.1039/d3nj05812c), 2024-01-01
Supplement: d3nj05812c1.pdf [file d3nj05812c1.pdf]

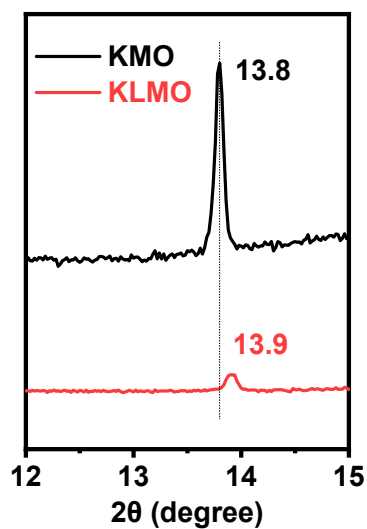

**Fig. S1.** Enlarged XRD profiles of (a) KMO and (d) KLMO

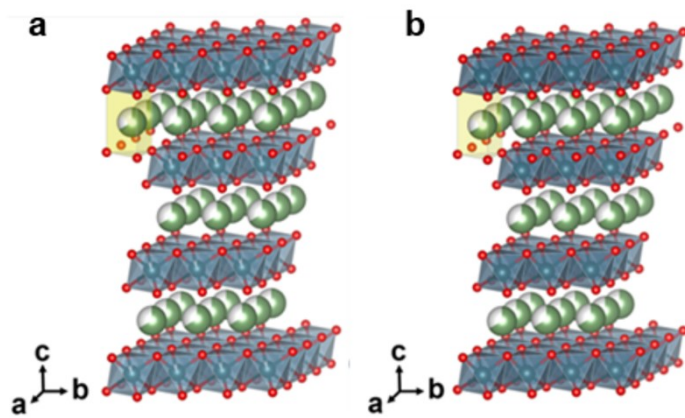

**Fig. S2** Crystal structures of (a) KLMO and (b) KMO along the c-axis.

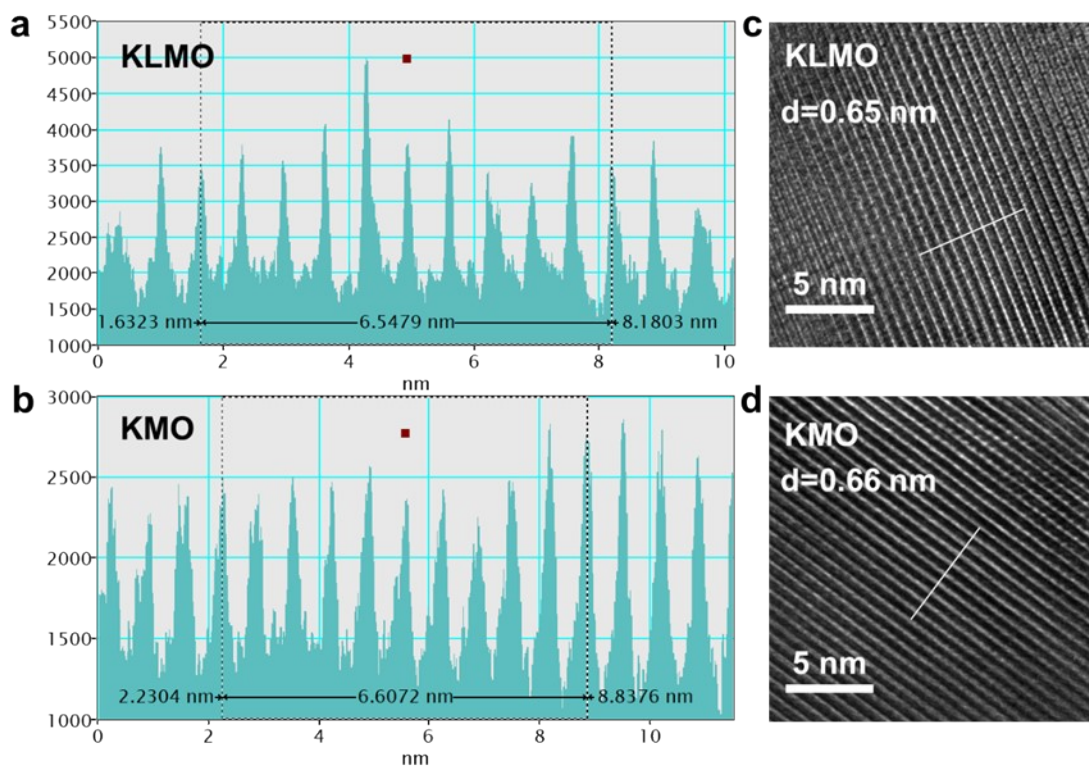

**Fig. S3** The intensity line profiles of signals corresponding to (a) KLMO and (b) KMO from (c-d) HRTEM images.

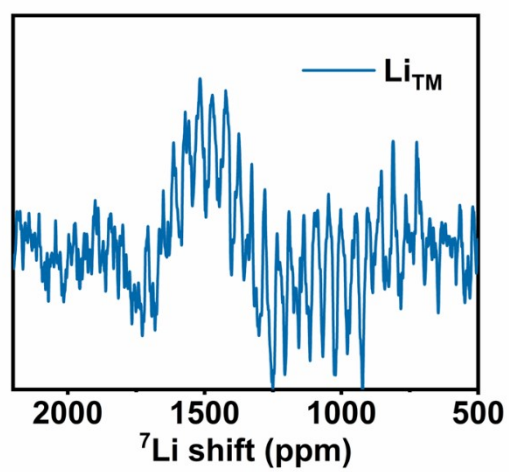

Fig. S4  ${}^7\text{Li}$  ss-NMR of KLMO.

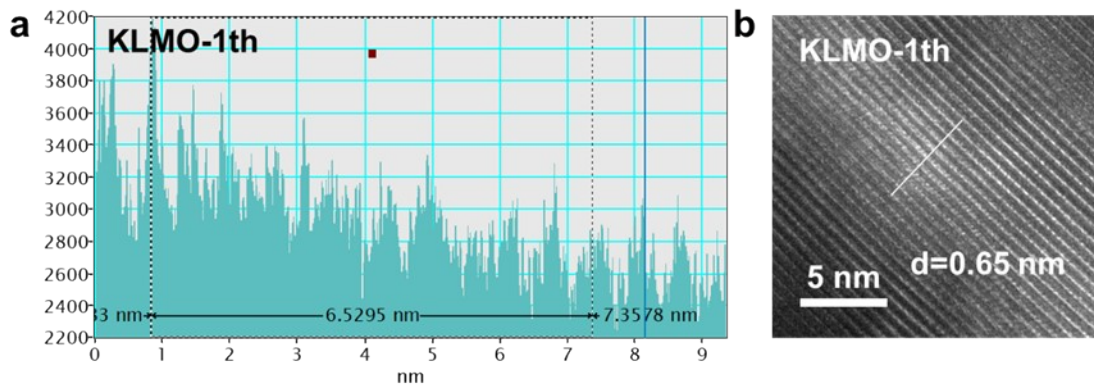

**Fig. S5** The intensity line profiles of signals corresponding to (a) KLMO after one cycle from (b) HRTEM image.

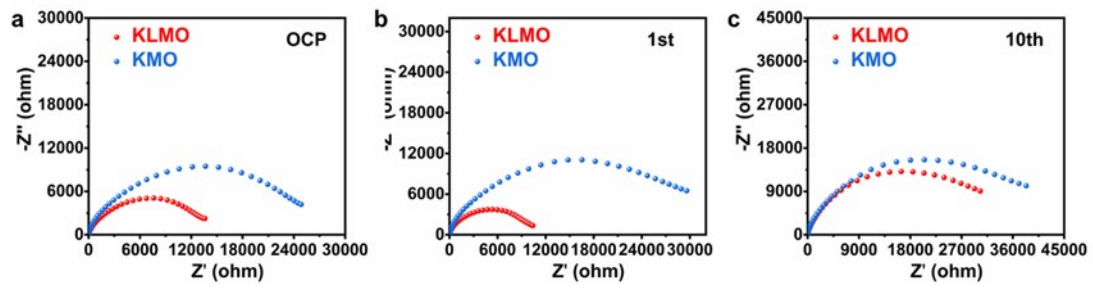

**Fig. S6** EIS plots of KLMO and KMO (a) at open-circuit voltage, (b) after 1 cycle, and (c) 10 cycles.

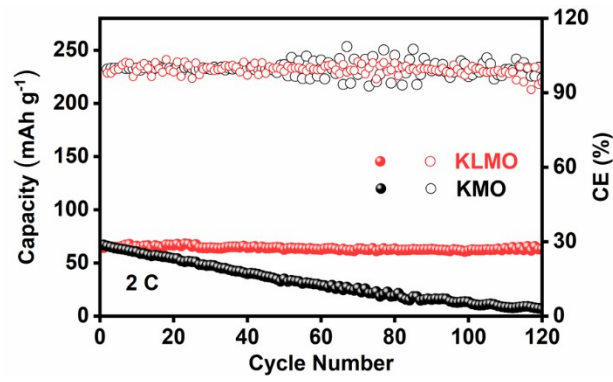

Fig. S7 Cycle stabilities of KMO and KLMO at 2C.
